# Supplementary material
Source: Springer Nature journal article supplement (https://www.springermedizin.de/resource/supplementary/12865_2008_255_MOESM2_ESM.pdf/9427610)

# (a) Adult DCs

# (b) CB DCs

## TLR-3

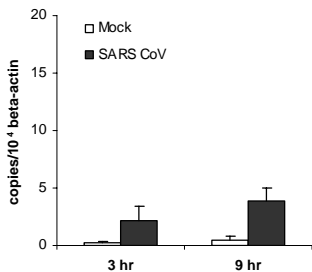

## TLR-3

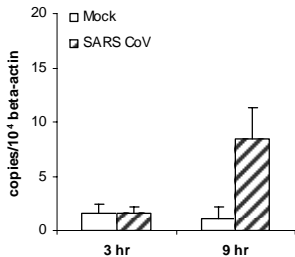

## TLR-7

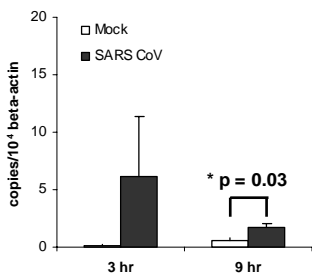

## TLR-7

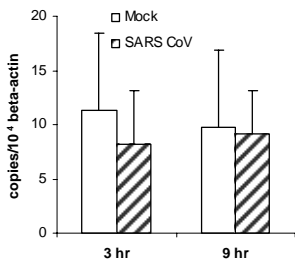

## TLR-8

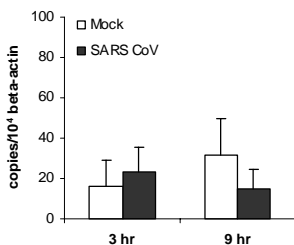

## TLR-8

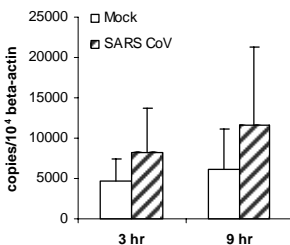

## TLR-9

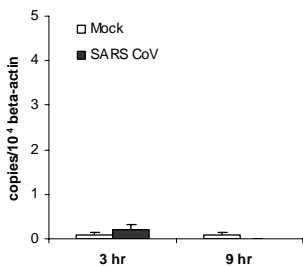

## TLR-9

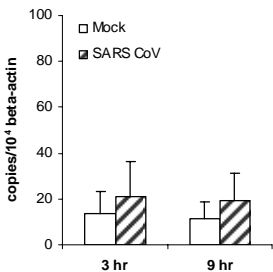

Supplement: MOESM2 [file 9427610]
